# Supplementary material
Source: publisher figshare collection journal article supplement (https://karger.figshare.com/ndownloader/files/27729123)
Supplement: Supplementary file 1 [file 27729123]

| **Supplemental Table 1.** Parameters used to calculate wellness scores. | | |
| --- | --- | --- |
| Parameter | Grading | Score |
| Activity | Normal/medium/low | 2 / 1 / 0 |
| Fur | Smooth/fluffy/erect | 2 / 1 / 0 |
| Eyes | Clean and open / clean and closed / dirty and closed | 2 / 1 / 0 |
| Able to stand straight | Yes/no | 1 / 0 |
| Posture | Normal / modestly curled / fully curled up | 2 / 1 / 0 |
| Position on feet | Normal/high | 1 / 0 |
| Solitary | Yes / No | 1 / 0 |
| Shivering | Yes / No | 1 / 0 |
